# Supplementary material for: Comprehensive Genome-Wide Analysis of Histone Acetylation Genes in Roses and Expression Analyses in Response to Heat Stress
Source: MDPI journal article supplement (doi:10.3390/genes13060980), 2022-05-30
Supplement: s1 [file s1]

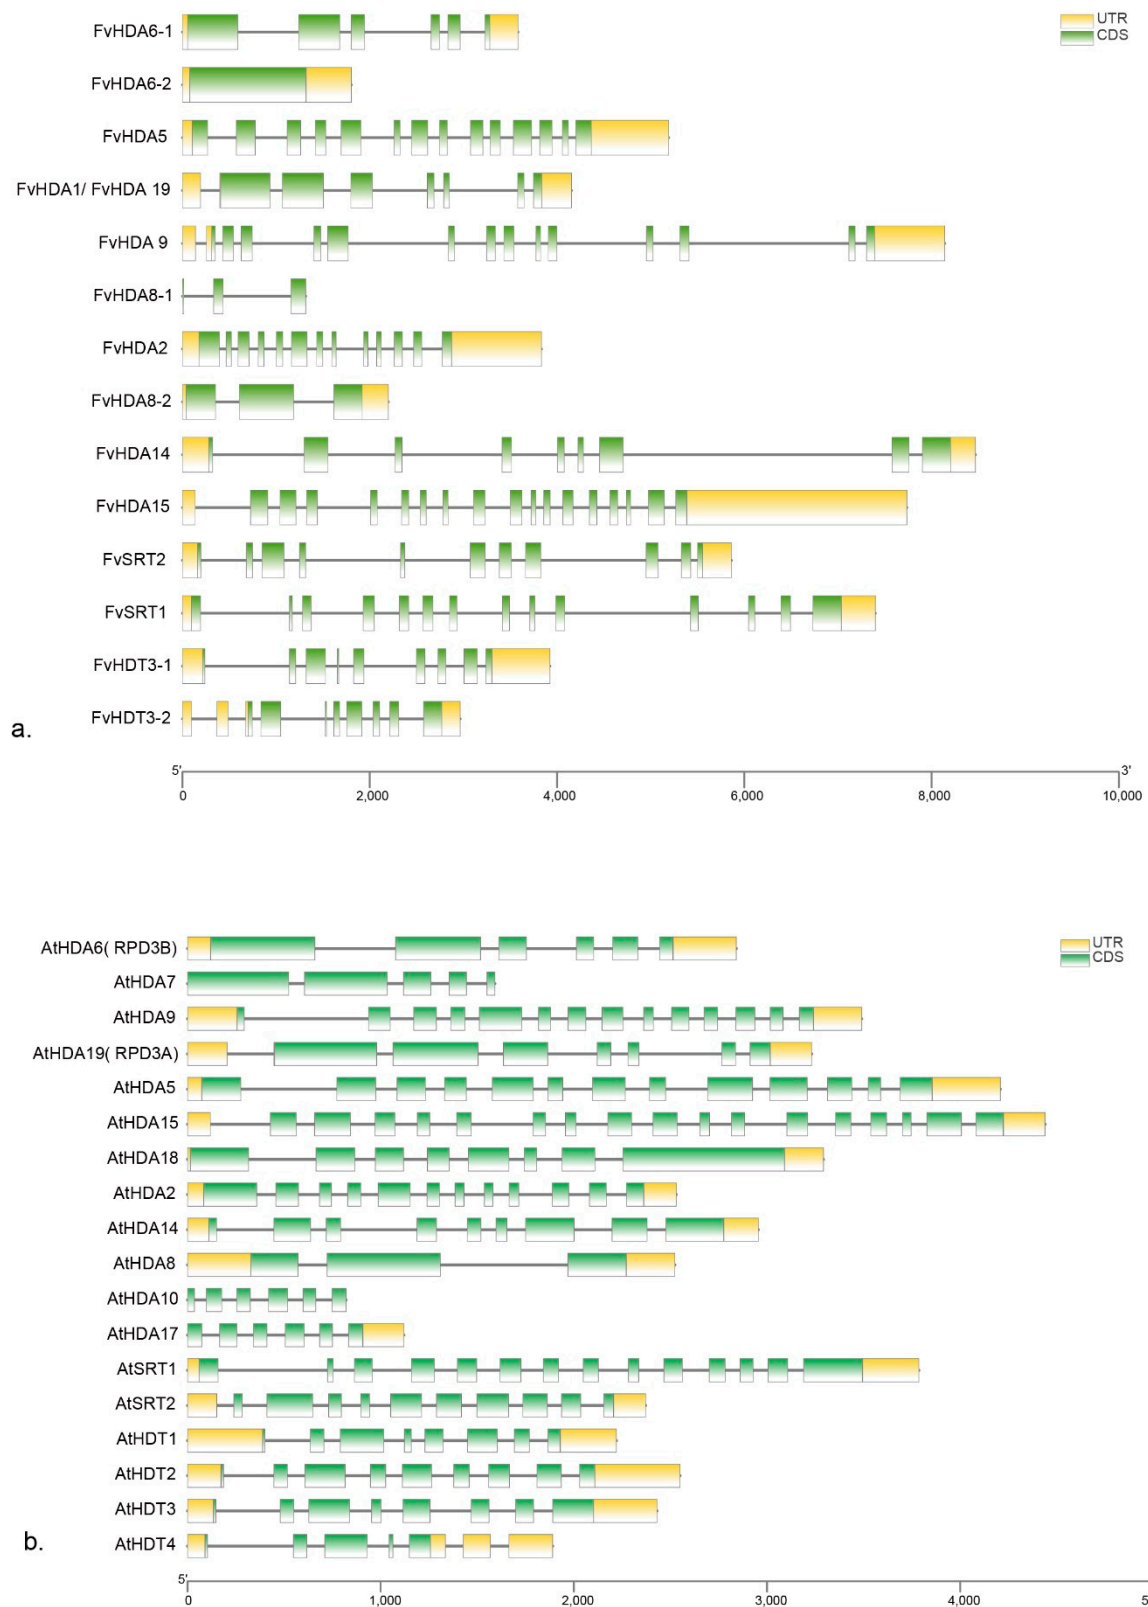

**Figure S1.** Structures of HDAC genes in *F. vesca* (a) and *A. thaliana* (b). UTR and CDS are indicated by yellow and green boxes, respectively. The lines indicate introns.

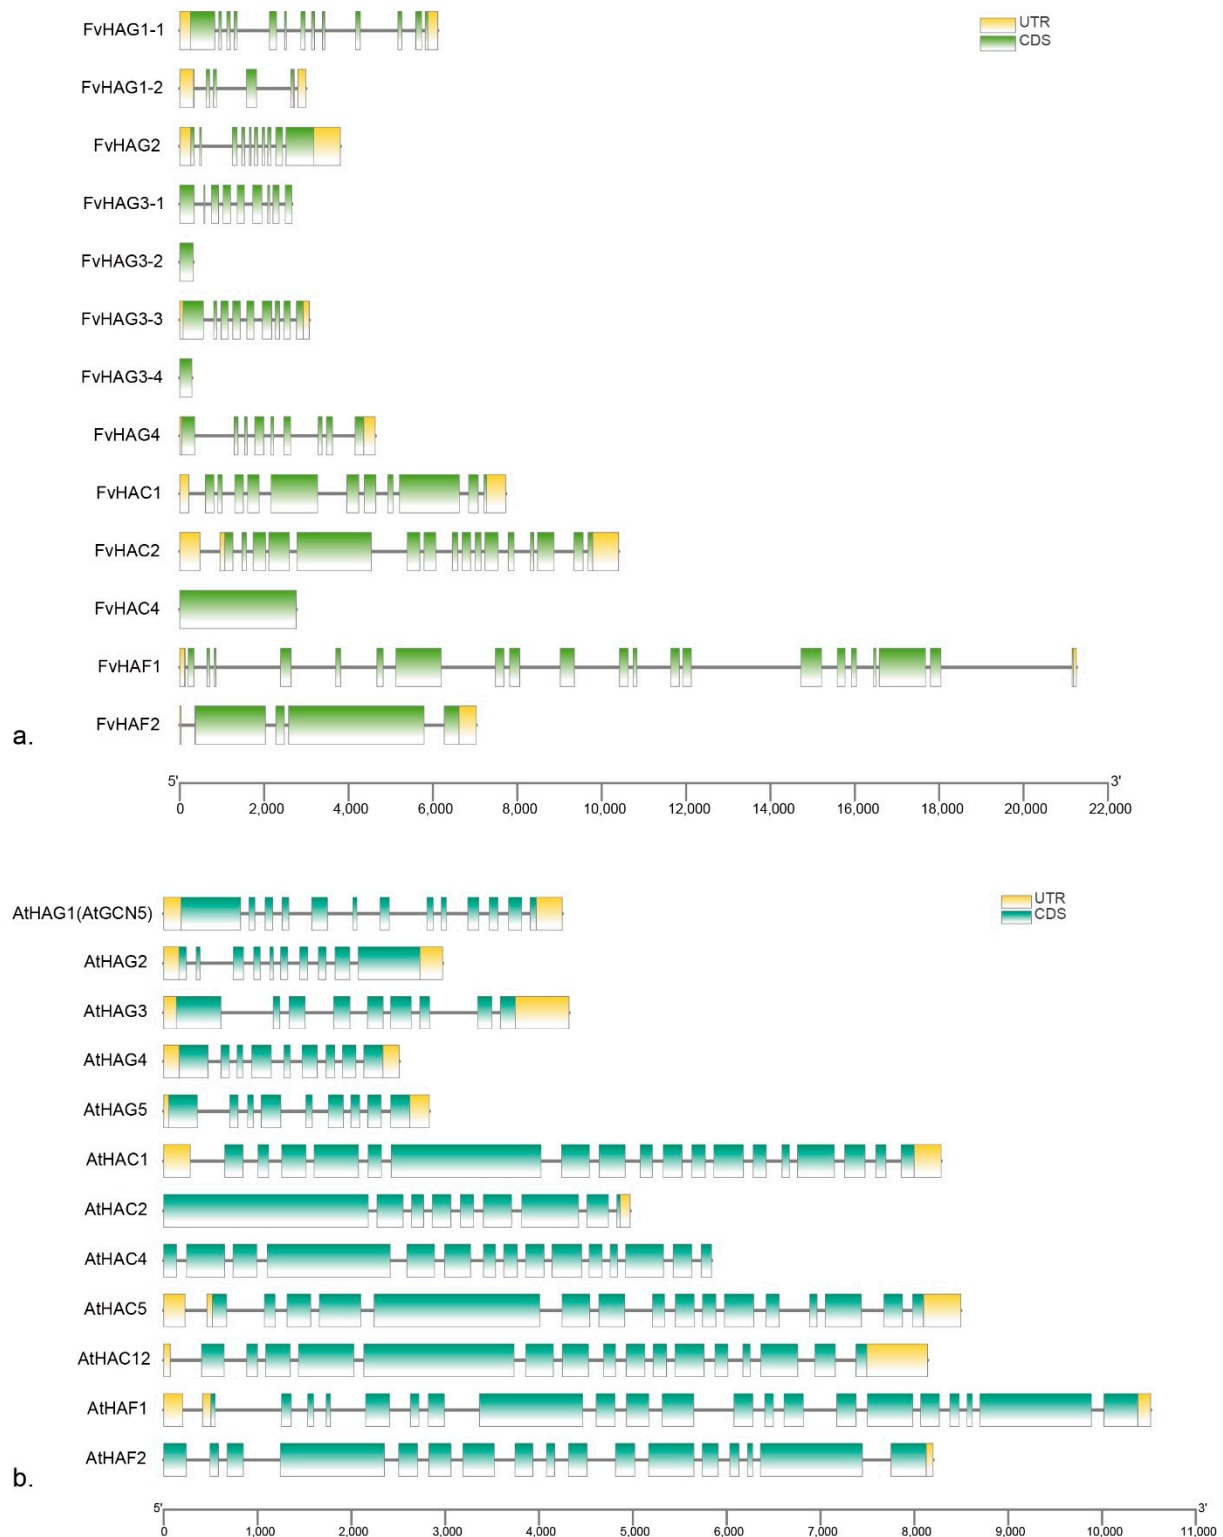

**Figure S2.** HAT genes structures of in *F. vesca* (a) and *A. thaliana* (b). UTR and CDS are indicated by yellow and green boxes, respectively. The lines indicate introns.

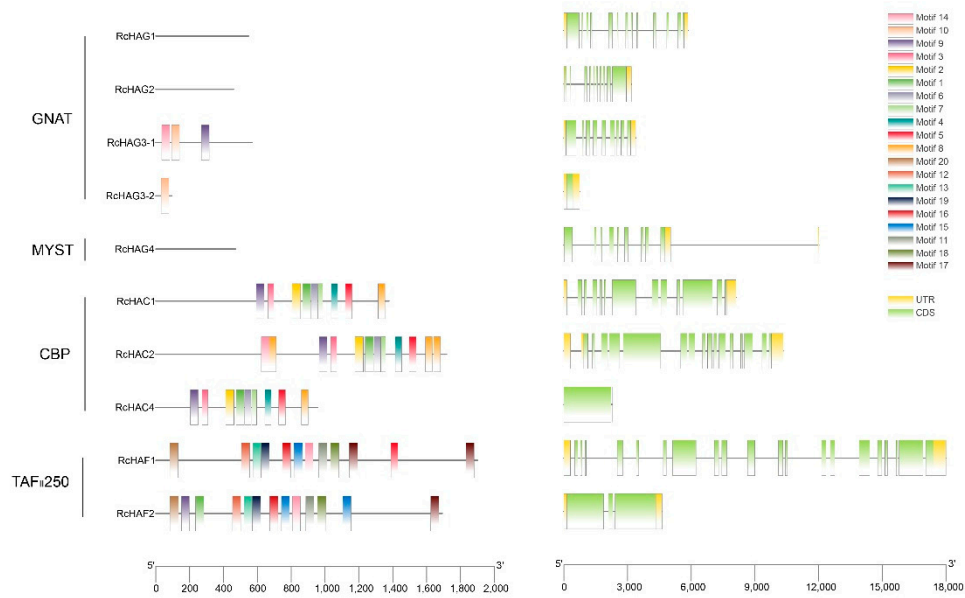

**Figure S3.** Conserved motifs and gene structures analysis of ten *R. chinensis* HATs. Motifs 1 to 20 are indicated by colored boxes. UTR and CDS are indicated by yellow and green boxes, respectively. The lines indicate introns.

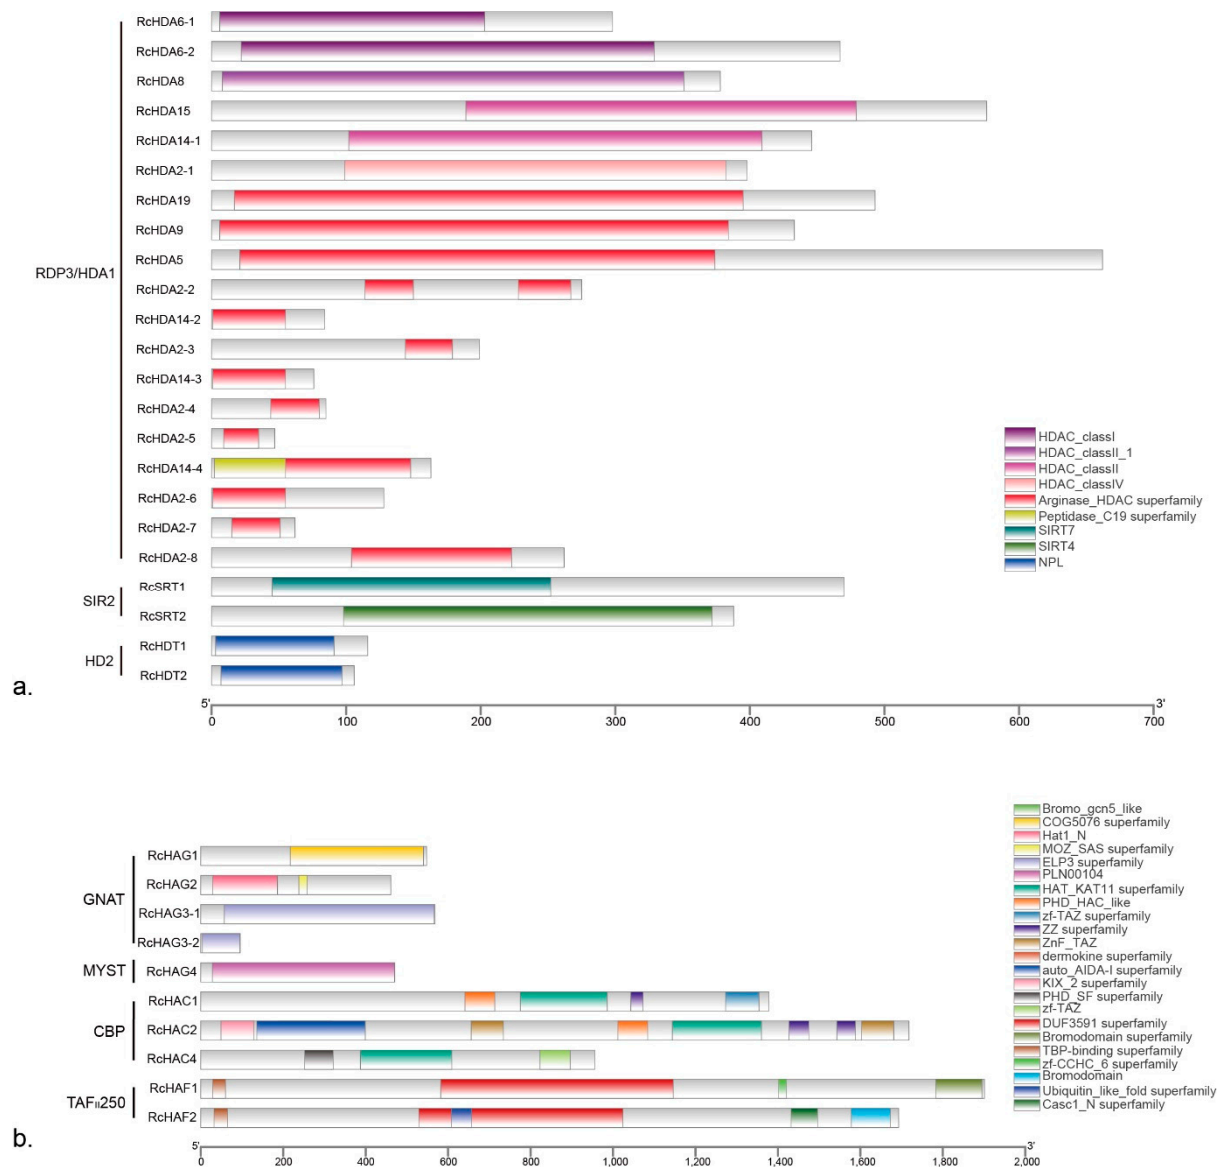

**Figure S4.** Conserved domains distribution in 23 HDAC proteins (**a**) and 10 HAT proteins (**b**) of *R. chinensis*. Domains are shown as colored boxes.

**Table S1.** HDAC and HAT genes in *A. thaliana*.

| Gene subfamily        | Gene ID            | name                   |
|-----------------------|--------------------|------------------------|
| RPD3/HDA1             | <i>AT5G63110.1</i> | <i>AtHDA6</i> (RPD3B)  |
|                       | <i>AT5G35600.1</i> | <i>AtHDA7</i>          |
|                       | <i>AT3G44680.1</i> | <i>AtHDA9</i>          |
|                       | <i>AT4G38130.1</i> | <i>AtHDA19</i> (RPD3A) |
|                       | <i>AT5G61060.2</i> | <i>AtHDA5</i>          |
|                       | <i>AT3G18520.2</i> | <i>AtHDA15</i>         |
|                       | <i>AT5G61070.1</i> | <i>AtHDA18</i>         |
|                       | <i>AT5G26040.2</i> | <i>AtHDA2</i>          |
|                       | <i>AT4G33470.1</i> | <i>AtHDA14</i>         |
|                       | <i>AT1G08460.1</i> | <i>AtHDA8</i>          |
|                       | <i>AT3G44660.1</i> | <i>AtHDA10</i>         |
|                       | <i>AT3G44490.1</i> | <i>AtHDA17</i>         |
| SIR2                  | <i>AT5G55760.1</i> | <i>AtSRT1</i>          |
|                       | <i>AT5G09230.7</i> | <i>AtSRT2</i>          |
| HD2                   | <i>AT3G44750.1</i> | <i>AtHDT1</i>          |
|                       | <i>AT5G22650.1</i> | <i>AtHDT2</i>          |
|                       | <i>AT5G03740.1</i> | <i>AtHDT3</i>          |
|                       | <i>AT2G27840.1</i> | <i>AtHDT4</i>          |
| GNAT                  | <i>AT3G54610.1</i> | <i>AtHAG1</i> (AtGCN5) |
|                       | <i>AT5G56740.1</i> | <i>AtHAG2</i>          |
|                       | <i>AT5G50320.1</i> | <i>AtHAG3</i>          |
| MYST                  | <i>AT5G64610.1</i> | <i>AtHAG4</i>          |
|                       | <i>AT5G09740.1</i> | <i>AtHAG5</i>          |
| CBP                   | <i>AT1G79000.2</i> | <i>AtHAC1</i>          |
|                       | <i>AT1G67220.1</i> | <i>AtHAC2</i>          |
|                       | <i>AT1G55970.1</i> | <i>AtHAC4</i>          |
|                       | <i>AT3G12980.1</i> | <i>AtHAC5</i>          |
|                       | <i>AT1G16710.1</i> | <i>AtHAC12</i>         |
| TAF <sub>II</sub> 250 | <i>AT1G32750.1</i> | <i>AtHAF1</i>          |
|                       | <i>AT3G19040.1</i> | <i>AtHAF2</i>          |

**Table S2.** List of primers used in this study.

| gene             | Primer-F                   | Primer-R                    |
|------------------|----------------------------|-----------------------------|
| <i>RcHDA6-1</i>  | TTGCCTGACAACGACTACCAT      | TATTGTCTTCCGCCTCCTCC        |
| <i>RcHDA6-2</i>  | TGTTGCTCGTTGCTGGTGCTATG    | GTTGGCGGTGTTGTCTGGAAGG      |
| <i>RcHDA19</i>   | GCAGCAAGAAGAGTAAAGAAAAGAGA | TCCATAGACCCAGAGCCCATA       |
| <i>RcHDA5</i>    | ATGTGCCTGTATAGAATTACGCTCG  | TGGAATGTCACGCTCCTTGC        |
| <i>RcHDA15</i>   | GGGGAGGCGGAGATAAGTC        | TACTTGAAACATCAGGCAGCG       |
| <i>RcHDA2-1</i>  | ACTCCGCCGCTCAAGAACTC       | CGAAGAGTAAATCAACGGCACCT     |
| <i>RcHDA2-2</i>  | GTGGAGGAAGGCAATAGAGGTA     | CTGAGAGATTTGGCATCGTTTAG     |
| <i>RcHDA2-5</i>  | CATCAATGTGGGAGGACTGG       | ACCCTTGAGTATGTTTAACGGC      |
| <i>RcHDA8</i>    | TACTCAGCCTATTGTCTTCAT      | GATAATCGCTCGTCCTCA          |
| <i>RcHDA14-2</i> | TATATTCTTCCTTTCAACTCACCAA  | GGAGTAAACTTCAAATCTAGACTAGCA |
| <i>RcHDA14-3</i> | CCTTTCAACTCACCAAGTAACAAT   | CTAGACTAGCATAACAAGAACATATAA |
| <i>RcSRT2</i>    | TGTCCAAACCTCAACCCAAGT      | GGATCTGAATCAGGAGCCAAC       |
| <i>RcHDT1</i>    | ACCAAGGCAATGTGGTGCA        | CCCATTACGGATTGATAACCAGCA    |
| <i>RcHDT2</i>    | TCTTTCACAGGCCTGTCTGGA      | TCCATGGAAGTGGACGCTCC        |
| <i>RcHAG1</i>    | CTGTACGGTGGGGCCTACTTC      | CCCTGCTTCCTCCTCTCTCTT       |
| <i>RcHAG2</i>    | ATTTACCTGGTTTCTAGCAAA      | GACTGTCAACAAGGGTCTCAC       |
| <i>RcHAG4</i>    | TAAACTTAGAATGGGTTGATAGG    | GCCGGAGTGAGGCTTGTT          |
| <i>RcHAC1</i>    | CAGCTGGCTTCGTACTTTGGT      | GCTCATTACATAGTCGTCCTCC      |
| <i>RcHAC4</i>    | CAATTTGACACCCTACGCC        | TGCTGCTGCATGTCTTGTT         |
| <i>RcHAF1</i>    | CCAAATTACGTGATGCAGGAG      | TTTTCAGAATCTAACGAGCCAAT     |
| <i>RcHAF2</i>    | AAGGGCTCGTAATGAGAAGGC      | TTCATCACCCATAAGCAACCG       |
| <i>RcACTIN</i>   | TCAAGGATTGGTGGACTTCAGT     | ACCAGAGAACAAGAATGCAAGC      |
| <i>RcGAPDH</i>   | GCTGGCAGGTATCCTTTCTG       | GGCGACAATATCAGCCAAGT        |

**Table S3.** Genes encoding putative HDAC and HAT genes homologues in *R. chinensis*.

| Subfamily             | Gene ID                     | Name             |
|-----------------------|-----------------------------|------------------|
| RPD3/HDA1             | <i>RchiOBHmChr3g0484871</i> | <i>RcHDA6-1</i>  |
|                       | <i>RchiOBHmChr7g0192801</i> | <i>RcHDA6-2</i>  |
|                       | <i>RchiOBHmChr5g0048241</i> | <i>RcHDA8</i>    |
|                       | <i>RchiOBHmChr7g0184671</i> | <i>RcHDA15</i>   |
|                       | <i>RchiOBHmChr2g0121851</i> | <i>RcHDA14-1</i> |
|                       | <i>RchiOBHmChr6g0310741</i> | <i>RcHDA2-1</i>  |
|                       | <i>RchiOBHmChr6g0281731</i> | <i>RcHDA19</i>   |
|                       | <i>RchiOBHmChr7g0218461</i> | <i>RcHDA9</i>    |
|                       | <i>RchiOBHmChr7g0183031</i> | <i>RcHDA5</i>    |
|                       | <i>RchiOBHmChr4g0398391</i> | <i>RcHDA2-2</i>  |
|                       | <i>RchiOBHmChr6g0252021</i> | <i>RcHDA14-2</i> |
|                       | <i>RchiOBHmChr4g0419371</i> | <i>RcHDA2-3</i>  |
|                       | <i>RchiOBHmChr1g0346631</i> | <i>RcHDA14-3</i> |
|                       | <i>RchiOBHmChr5g0034671</i> | <i>RcHDA2-4</i>  |
|                       | <i>RchiOBHmChr5g0034681</i> | <i>RcHDA2-5</i>  |
|                       | <i>RchiOBHmChr6g0304611</i> | <i>RcHDA14-4</i> |
|                       | <i>RchiOBHmChr6g0269961</i> | <i>RcHDA2-6</i>  |
|                       | <i>RchiOBHmChr6g0269981</i> | <i>RcHDA2-7</i>  |
|                       | <i>RchiOBHmChr5g0028711</i> | <i>RcHDA2-8</i>  |
| SIR2                  | <i>RchiOBHmChr5g0053471</i> | <i>RcSRT1</i>    |
|                       | <i>RchiOBHmChr2g0122631</i> | <i>RcSRT2</i>    |
| HD2                   | <i>RchiOBHmChr5g0055321</i> | <i>RcHDT1</i>    |
|                       | <i>RchiOBHmChr3g0472041</i> | <i>RcHDT2</i>    |
| GNAT                  | <i>RchiOBHmChr6g0289651</i> | <i>RcHAG1</i>    |
|                       | <i>RchiOBHmChr2g0092581</i> | <i>RcHAG2</i>    |
|                       | <i>RchiOBHmChr7g0191201</i> | <i>RcHAG3-1</i>  |
|                       | <i>RchiOBHmChr5g0026811</i> | <i>RcHAG3-2</i>  |
| MYST                  | <i>RchiOBHmChr7g0240841</i> | <i>RcHAG4</i>    |
| CBP                   | <i>RchiOBHmChr2g0163411</i> | <i>RcHAC1</i>    |
|                       | <i>RchiOBHmChr2g0148331</i> | <i>RcHAC2</i>    |
|                       | <i>RchiOBHmChr3g0448221</i> | <i>RcHAC4</i>    |
| TAF <sub>II</sub> 250 | <i>RchiOBHmChr3g0492481</i> | <i>RcHAF1</i>    |
|                       | <i>RchiOBHmChr5g0013481</i> | <i>RcHAF2</i>    |

**Table S4.** Genes encoding putative HDAC and HAT genes homologues in *R. multiflora*.

| Subfamily             | Gene ID                           | Name            |
|-----------------------|-----------------------------------|-----------------|
| RPD3/HDA1             | <i>Rmu_sc0003880.1_g000035.1</i>  | <i>RmHDA14</i>  |
|                       | <i>Rmu_ssc0000289.1_g000024.1</i> | <i>RmHDA15</i>  |
|                       | <i>Rmu_sc0004688.1_g000027.1</i>  | <i>RmHDA2</i>   |
|                       | <i>Rmu_ssc0000395.1_g000018.1</i> | <i>RmHDA2</i>   |
|                       | <i>Rmu_sc0001408.1_g000004.1</i>  | <i>RmHDA8</i>   |
|                       | <i>Rmu_sc0002040.1_g000028.1</i>  | <i>RmHDA6</i>   |
|                       | <i>Rmu_sc0000014.1_g000006.1</i>  | <i>RmHDA5</i>   |
|                       | <i>Rmu_ssc0000126.1_g000063.1</i> | <i>RmHDA19</i>  |
|                       | <i>Rmu_sc0001301.1_g000083.1</i>  | <i>RmHDA9</i>   |
|                       | <i>Rmu_sc0006898.1_g000006.1</i>  | <i>RmHDA14</i>  |
|                       | <i>Rmu_sc0010612.1_g000002.1</i>  | <i>RmHDA14</i>  |
|                       | <i>Rmu_sc0002351.1_g000007.1</i>  | <i>RmHDA14</i>  |
|                       | <i>Rmu_sc0003880.1_g000030.1</i>  | <i>RmHDA2</i>   |
|                       | <i>Rmu_sc0003720.1_g000019.1</i>  | <i>RmHDA2</i>   |
|                       | <i>Rmu_sc0003184.1_g000002.1</i>  | <i>RmHDA14</i>  |
|                       | <i>Rmu_sc0006653.1_g000010.1</i>  | <i>RmHDA6</i>   |
|                       | <i>Rmu_sc0002194.1_g000035.1</i>  | <i>RmHDA14</i>  |
|                       | <i>Rmu_sc0021556.1_g000004.1</i>  | <i>RmHDA9</i>   |
| SIR2                  | <i>Rmu_sc0005966.1_g000015.1</i>  | <i>RmSRT1</i>   |
|                       | <i>Rmu_sc0003133.1_g000010.1</i>  | <i>RmSRT2</i>   |
| HD2                   | <i>Rmu_sc0003641.1_g000018.1</i>  | <i>RmHDT1</i>   |
|                       | <i>Rmu_co8477099.1_g000001.1</i>  | <i>RmHDT1</i>   |
|                       | <i>Rmu_sc0002532.1_g000010.1</i>  | <i>RmHDT1</i>   |
|                       | <i>Rmu_sc0001665.1_g000047.1</i>  | <i>RmHDT1</i>   |
|                       | <i>Rmu_sc0011151.1_g000006.1</i>  | <i>RmHDT1</i>   |
|                       | <i>Rmu_sc0012467.1_g000004.1</i>  | <i>RmHDT2</i>   |
| GNAT                  | <i>Rmu_sc0005376.1_g000013.1</i>  | <i>RmHAG1</i>   |
|                       | <i>Rmu_co8234453.1_g000001.1</i>  | <i>RmHAG3-1</i> |
|                       | <i>Rmu_sc0019130.1_g000001.1</i>  | <i>RmHAG3-2</i> |
|                       | <i>Rmu_sc0003674.1_g000014.1</i>  | <i>RmHAG3-3</i> |
|                       | <i>Rmu_ssc0000172.1_g000023.1</i> | <i>RmHAG3-4</i> |
|                       | <i>Rmu_sc0016007.1_g000009.1</i>  | <i>RmHAG3-5</i> |
| MYST                  | <i>Rmu_sc0002313.1_g000023.1</i>  | <i>RmHAG4</i>   |
|                       | <i>Rmu_co8495669.1_g000001.1</i>  | <i>RmHAG5-1</i> |
|                       | <i>Rmu_sc0004821.1_g000016.1</i>  | <i>RmHAG5-2</i> |
| CBP                   | <i>Rmu_ssc0000231.1_g000004.1</i> | <i>RmHAC1</i>   |
|                       | <i>Rmu_sc0005969.1_g000037.1</i>  | <i>RmHAC2</i>   |
|                       | <i>Rmu_sc0005969.1_g000044.1</i>  | <i>RmHAC4</i>   |
| TAF <sub>II</sub> 250 | <i>Rmu_sc0003458.1_g000019.1</i>  | <i>RmHAF1</i>   |
|                       | <i>Rmu_sc0020049.1_g000002.1</i>  | <i>RmHAF2-1</i> |
|                       | <i>Rmu_sc0000971.1_g000001.1</i>  | <i>RmHAF2-2</i> |



**Table S5.** Gene encoding putative HDAC and HAT genes homologues in *F. vesca*.

| Subfamily             | Gene ID                | Gene ID in old nomenclature | Name                    |
|-----------------------|------------------------|-----------------------------|-------------------------|
| RPD3/HDA1             | <i>FvH4_5g06060.t1</i> | <i>gene09844</i>            | <i>FvHDA6-1</i>         |
|                       | <i>FvH4_1g25790.t1</i> | <i>gene12349</i>            | <i>FvHDA6-2</i>         |
|                       | <i>FvH4_5g13910.t1</i> | <i>gene37149</i>            | <i>FvHDA5</i>           |
|                       | <i>FvH4_2g17240.t1</i> | <i>gene17127</i>            | <i>FvHDA1/ FvHDA 19</i> |
|                       | <i>FvH4_5g27310.t1</i> | <i>gene29263</i>            | <i>FvHDA 9</i>          |
|                       | <i>FvH4_3g26570.t1</i> | <i>gene40220</i>            | <i>FvHDA8-1</i>         |
|                       | <i>FvH4_2g32010.t1</i> | <i>gene35931</i>            | <i>FvHDA2</i>           |
|                       | <i>FvH4_3g26560.t1</i> | <i>gene27053</i>            | <i>FvHDA8-2</i>         |
|                       | <i>FvH4_1g24510.t1</i> | <i>gene16203</i>            | <i>FvHDA14</i>          |
|                       | <i>FvH4_5g12660.t1</i> | <i>gene26215</i>            | <i>FvHDA15</i>          |
| SIR2                  | <i>FvH4_1g24990.t1</i> | <i>gene16117</i>            | <i>FvSRT2</i>           |
|                       | <i>FvH4_3g29170.t1</i> | <i>gene15261</i>            | <i>FvSRT1</i>           |
| HD2                   | <i>FvH4_6g17790.t1</i> | <i>gene30136</i>            | <i>FvHDT3-1</i>         |
|                       | <i>FvH4_3g29940.t1</i> | <i>gene14356</i>            | <i>FvHDT3-2</i>         |
| GNAT                  | <i>FvH4_2g22590.t1</i> | <i>gene35776</i>            | <i>FvHAG1</i>           |
|                       | <i>FvH4_1g06810.t1</i> | <i>gene11375</i>            | <i>FvHAG2</i>           |
|                       | <i>FvH4_4g08670.t1</i> | <i>gene20524</i>            | <i>FvHAG3-1</i>         |
|                       | <i>FvH4_5g07450.t1</i> | <i>gene41363</i>            | <i>FvHAG3-2</i>         |
|                       | <i>FvH4_5g07410.t1</i> | <i>gene41358</i>            | <i>FvHAG3-3</i>         |
|                       | <i>FvH4_5g07340.t1</i> | <i>gene09922</i>            | <i>FvHAG3-4</i>         |
|                       | <i>FvH4_3g25041.t1</i> | <i>gene21768</i>            | <i>FvHAG3-5</i>         |
| MYST                  | <i>FvH4_5g38850.t1</i> | <i>gene02241</i>            | <i>FvHAG4</i>           |
| CBP                   | <i>FvH4_6g45470.t1</i> | <i>gene10338</i>            | <i>FvHAC1</i>           |
|                       | <i>FvH4_6g36320.t1</i> | <i>gene37806</i>            | <i>FvHAC2</i>           |
|                       | <i>FvH4_6g00740.t1</i> | <i>gene16783</i>            | <i>FvHAC4</i>           |
| TAF <sub>II</sub> 250 | <i>FvH4_1g29900.t1</i> | <i>gene30351</i>            | <i>FvHAF1</i>           |
|                       | <i>FvH4_3g05980.t1</i> | <i>gene30562</i>            | <i>FvHAF2</i>           |

**Table S6.** Genes encoding putative HDAC and HAT genes homologues in *R. rugosa*.

| Subfamily             | Gene ID                    | name            |
|-----------------------|----------------------------|-----------------|
| RPD3/HDA1             | <i>evm.model.Chr5.3090</i> | <i>RrHDA8</i>   |
|                       | <i>evm.model.Chr6.3259</i> | <i>RrHDA14</i>  |
|                       | <i>evm.model.Chr7.515</i>  | <i>RrHDA5</i>   |
|                       | <i>evm.model.Chr7.659</i>  | <i>RrHDA15</i>  |
|                       | <i>evm.model.Chr2.3097</i> | <i>RrHDA19</i>  |
|                       | <i>evm.model.Chr7.1281</i> | <i>RrHDA6</i>   |
|                       | <i>evm.model.Chr7.3446</i> | <i>RrHDA9-1</i> |
|                       | <i>evm.model.Chr7.3445</i> | <i>RrHDA9-2</i> |
|                       | <i>evm.model.Chr2.220</i>  | <i>RrHDA2-1</i> |
|                       | <i>evm.model.Chr5.620</i>  | <i>RrHDA2-2</i> |
| SIR2                  | <i>evm.model.Chr5.2852</i> | <i>RrSRT1</i>   |
| HD2                   | <i>evm.model.Chr5.2728</i> | <i>RrHDT1</i>   |
| GANT                  | <i>evm.model.Chr2.2236</i> | <i>RrHAG1-1</i> |
|                       | <i>evm.model.Chr2.2382</i> | <i>RrHAG1-2</i> |
|                       | <i>evm.model.Chr6.759</i>  | <i>RrHAG2</i>   |
|                       | <i>evm.model.Chr7.1155</i> | <i>RrHAG3-1</i> |
|                       | <i>evm.model.Chr5.413</i>  | <i>RrHAG3-2</i> |
| MYST                  | <i>evm.model.Chr7.5663</i> | <i>RrHAG4</i>   |
| CBP                   | <i>evm.model.Chr6.4885</i> | <i>RrHAC1</i>   |
|                       | <i>evm.model.Chr6.6060</i> | <i>RrHAC2</i>   |
|                       | <i>evm.model.Chr4.83</i>   | <i>RrHAC4</i>   |
| TAF <sub>II</sub> 250 | <i>evm.model.Chr3.1433</i> | <i>RrHAF1</i>   |
|                       | <i>evm.model.Chr5.5920</i> | <i>RrHAF2</i>   |

**Table S7. The FPKM values of HDAC and HAT genes in two *Rosa* species (*R. chinensis* ‘OB’ , *R. wichurana* ‘Rw’) and one modern rose cultivar (*R. hybrida* ‘Yesterday’ ‘Ry’).**

| Gene ID          | Ro      | Ste     | Le      | Sta     | Ca      | FB_GP   | FB_CP   | FB_PP   | OF_PP   | Rw_root | Rw_stem | Rw_leaf | Rw_bud  | Ry_root | Ry_stem | Ry_leaf | Ry_bud  |
|------------------|---------|---------|---------|---------|---------|---------|---------|---------|---------|---------|---------|---------|---------|---------|---------|---------|---------|
| <i>RcHDA6-1</i>  | 0.0000  | 0.0000  | 0.0000  | 0.0000  | 0.0000  | 0.0000  | 0.0000  | 0.0000  | 0.0000  | 0.0000  | 0.0000  | 0.0000  | 0.0000  | 0.0000  | 0.0000  | 0.0000  | 0.0000  |
| <i>RcHDA6-2</i>  | 68.1931 | 33.9198 | 28.3161 | 33.0634 | 40.4769 | 31.5418 | 28.0425 | 27.9431 | 28.2591 | 22.2996 | 38.1760 | 5.2150  | 21.8344 | 24.4309 | 29.8293 | 4.5677  | 4.0711  |
| <i>RcHDA9</i>    | 15.7086 | 11.3277 | 12.9646 | 15.2004 | 16.3715 | 16.8983 | 14.3275 | 16.0481 | 21.2195 | 6.8115  | 7.2895  | 7.5479  | 9.5202  | 6.7564  | 5.9611  | 9.9143  | 3.0289  |
| <i>RcHDA19</i>   | 33.1515 | 31.0477 | 22.9788 | 26.3391 | 45.6942 | 68.9842 | 52.4317 | 32.1443 | 28.7274 | 18.7022 | 33.0654 | 9.9082  | 56.1723 | 40.4236 | 31.7014 | 11.2303 | 11.7476 |
| <i>RcHDA5</i>    | 5.3330  | 11.2574 | 7.4007  | 7.3819  | 11.6621 | 10.4497 | 8.8706  | 9.8802  | 9.5644  | 7.0039  | 4.5977  | 4.5117  | 13.6431 | 11.6056 | 4.9170  | 4.1314  | 1.1618  |
| <i>RcHDA15</i>   | 14.3632 | 11.7600 | 12.1302 | 8.2263  | 16.9770 | 23.8132 | 16.8517 | 14.5127 | 14.0623 | 7.8336  | 4.9695  | 5.7866  | 13.9829 | 7.3094  | 2.7549  | 8.0570  | 3.4514  |
| <i>RcHDA2-1</i>  | 7.0014  | 6.2643  | 7.1192  | 3.1700  | 7.8830  | 6.6625  | 5.8482  | 4.3865  | 2.5810  | 3.8068  | 3.8776  | 3.6504  | 3.5494  | 4.7202  | 5.0939  | 3.5281  | 0.8834  |
| <i>RcHDA2-2</i>  | 0.0000  | 0.0000  | 0.0000  | 0.3754  | 0.0000  | 0.0641  | 0.0000  | 0.0342  | 0.0247  | 0.0000  | 0.0000  | 0.6927  | 1.0737  | 0.0000  | 0.0000  | 0.0000  | 0.0000  |
| <i>RcHDA2-3</i>  | 0.0000  | 0.0000  | 0.0000  | 0.3518  | 0.1327  | 0.0235  | 0.1325  | 0.1446  | 0.7732  | 0.0000  | 0.1188  | 0.0000  | 0.0000  | 0.0000  | 0.0000  | 0.0000  | 0.0000  |
| <i>RcHDA2-4</i>  | 0.0909  | 0.0000  | 0.0000  | 0.0000  | 0.0000  | 0.0195  | 0.0578  | 0.0104  | 0.0845  | 0.0000  | 0.0000  | 0.0000  | 0.0000  | 0.0000  | 0.0000  | 0.0000  | 0.0000  |
| <i>RcHDA2-5</i>  | 0.2254  | 0.0000  | 0.0000  | 0.0000  | 0.0000  | 0.0000  | 0.0000  | 0.0319  | 0.0516  | 0.0000  | 0.0000  | 0.0000  | 0.0000  | 0.0000  | 0.0000  | 0.0000  | 0.0000  |
| <i>RcHDA2-6</i>  | 0.0000  | 0.0000  | 0.0000  | 0.0000  | 0.0000  | 0.0000  | 0.0000  | 0.0000  | 0.0000  | 0.0000  | 0.0000  | 0.0000  | 0.0000  | 0.0000  | 0.0000  | 0.0000  | 0.0000  |
| <i>RcHDA2-7</i>  | 0.0000  | 0.0000  | 0.0000  | 0.0000  | 0.0000  | 0.0000  | 0.0000  | 0.0000  | 0.0000  | 0.0000  | 0.0000  | 0.0000  | 0.0000  | 0.0000  | 0.0000  | 0.0000  | 0.0000  |
| <i>RcHDA2-8</i>  | 0.0000  | 0.0000  | 0.0000  | 0.0000  | 0.0000  | 0.0000  | 0.0000  | 0.0000  | 0.0000  | 0.0000  | 0.0000  | 0.0000  | 0.0000  | 0.0000  | 0.0000  | 0.0000  | 0.0000  |
| <i>RcHDA8</i>    | 8.8498  | 12.3024 | 12.6038 | 4.5005  | 14.1289 | 10.8250 | 9.3778  | 5.7932  | 6.0205  | 4.6929  | 5.1043  | 4.2204  | 6.3255  | 6.9875  | 8.5854  | 8.7573  | 2.6562  |
| <i>RcHDA14-1</i> | 1.5716  | 1.8422  | 35.7098 | 0.6125  | 3.1743  | 3.2659  | 2.2479  | 1.9753  | 2.1350  | 1.0073  | 3.8203  | 33.9351 | 3.8945  | 0.2820  | 1.8873  | 19.6914 | 0.5048  |
| <i>RcHDA14-2</i> | 0.0000  | 0.0000  | 0.0011  | 0.0000  | 0.0000  | 0.0000  | 0.0000  | 0.0000  | 0.0000  | 0.0000  | 0.0000  | 0.0000  | 0.0000  | 0.0000  | 0.0000  | 0.0000  | 0.0000  |
| <i>RcHDA14-3</i> | 0.0000  | 0.0000  | 0.0012  | 0.0000  | 0.0000  | 0.0081  | 0.0033  | 0.0000  | 0.1842  | 0.0000  | 0.0000  | 0.0000  | 0.0000  | 0.0000  | 0.0000  | 0.0000  | 0.0000  |
| <i>RcHDA14-4</i> | 0.0000  | 0.0000  | 0.0000  | 0.0000  | 0.0000  | 0.0000  | 0.0000  | 0.0000  | 0.0000  | 0.0000  | 0.0000  | 0.0000  | 0.0000  | 0.0000  | 0.0000  | 0.0000  | 0.0000  |
| <i>RcSRT1</i>    | 1.1230  | 2.5648  | 2.0542  | 2.0202  | 3.8120  | 6.6595  | 5.1210  | 3.4164  | 2.3537  | 1.2310  | 0.8315  | 1.7354  | 3.7786  | 1.3525  | 1.1302  | 2.9670  | 2.1712  |
| <i>RcSRT2</i>    | 1.2859  | 2.0135  | 7.6563  | 6.6269  | 5.6303  | 6.6596  | 6.5398  | 13.2916 | 61.7715 | 2.7285  | 3.2299  | 9.0707  | 5.2049  | 1.9986  | 1.2590  | 10.6192 | 1.7019  |
| <i>RcHDT1</i>    | 55.7067 | 39.4383 | 16.8726 | 9.8568  | 48.1027 | 75.9806 | 61.3818 | 23.1117 | 26.4237 | 19.9234 | 35.8015 | 8.0544  | 72.1256 | 32.1315 | 40.6580 | 12.0249 | 24.2593 |
| <i>RcHDT2</i>    | 19.7365 | 50.8300 | 25.1223 | 37.2040 | 62.3613 | 69.4529 | 53.5825 | 50.3504 | 24.7683 | 9.2588  | 16.3931 | 18.8225 | 37.8389 | 13.3724 | 9.4953  | 27.7609 | 18.0468 |
| <i>RcHAG1</i>    | 40.3758 | 18.8353 | 17.0497 | 18.3081 | 30.4076 | 28.7988 | 20.5563 | 15.5778 | 11.0712 | 13.5020 | 13.4019 | 3.7109  | 16.1484 | 12.7087 | 12.7984 | 5.0060  | 3.0419  |
| <i>RcHAG2</i>    | 8.4054  | 13.1040 | 7.0987  | 4.3462  | 13.9784 | 17.9579 | 7.6617  | 5.5181  | 6.1029  | 8.6889  | 17.3268 | 2.3689  | 41.3577 | 14.0490 | 12.6186 | 4.7209  | 9.8482  |
| <i>RcHAG3-1</i>  | 33.3840 | 12.5539 | 9.6280  | 6.4470  | 19.3447 | 45.0484 | 74.8625 | 33.8450 | 6.4529  | 10.4433 | 17.9833 | 2.8275  | 15.1442 | 12.1900 | 19.6265 | 1.3821  | 2.5073  |
| <i>RcHAG3-2</i>  | 4.1221  | 3.4514  | 2.3028  | 0.8712  | 3.4352  | 2.7092  | 1.8352  | 0.8752  | 0.2171  | 0.0000  | 0.0000  | 0.0000  | 0.0000  | 0.0000  | 0.0000  | 0.0000  | 0.0000  |
| <i>RcHAG4</i>    | 63.4138 | 29.7937 | 32.3686 | 31.2981 | 40.0903 | 45.1754 | 33.8188 | 33.6589 | 37.8126 | 17.2331 | 20.4130 | 15.0573 | 21.2715 | 22.3165 | 19.3228 | 14.1528 | 6.6573  |
| <i>RcHAC1</i>    | 2.0300  | 0.9935  | 5.2661  | 3.3711  | 2.8370  | 5.8198  | 3.6232  | 1.7109  | 1.0468  | 0.9230  | 0.5309  | 0.1433  | 1.1033  | 0.9413  | 0.3669  | 0.0728  | 0.0969  |
| <i>RcHAC2</i>    | 25.7755 | 16.6003 | 21.1333 | 16.9286 | 21.5600 | 19.7172 | 17.2877 | 18.1671 | 18.9509 | 11.0568 | 5.9854  | 1.3858  | 6.5107  | 13.4538 | 5.7406  | 0.8892  | 0.4081  |
| <i>RcHAC4</i>    | 0.0000  | 0.0000  | 0.0000  | 0.1361  | 0.0726  | 0.9516  | 0.8626  | 0.4982  | 0.1796  | 0.0369  | 0.0000  | 0.0000  | 0.0000  | 0.0855  | 0.0353  | 0.0161  | 0.0000  |
| <i>RcHAF1</i>    | 8.8430  | 7.1761  | 5.5243  | 10.3158 | 8.7373  | 9.3527  | 7.4391  | 9.6643  | 8.1126  | 5.3676  | 4.9543  | 0.4068  | 3.7509  | 6.3515  | 5.2237  | 0.1956  | 0.2868  |
| <i>RcHAF2</i>    | 1.7758  | 2.0367  | 2.0384  | 1.7070  | 3.2219  | 3.9685  | 3.5418  | 3.4146  | 2.4542  | 1.1152  | 0.8675  | 0.0282  | 0.5996  | 1.0679  | 0.5825  | 0.0000  | 0.0000  |

Organs from *R. chinensis* ‘Old blush’ are labeled as Ro: roots; Ste: stems; Le: leaves; Sta: stamens; Ca: carpels; FB\_GP: green petals in flower buds; FB\_CP: petals changing colors in flower buds; FB\_PP: pink petals ; and OF\_PP: pink petals in open flowers. Organs from *R. wichurana* are labelled with ‘Rw’ (ex. *Rw\_root* , etc.) , and those from *R. hybrida* ‘Yesterday’ are labelled with ‘Ry’ (ex. *Ry\_root*, etc.)

**Table S8. The expression values of selected HDAC and HAT genes in ‘CL’ roses grown under control (25°C) and high temperature (35°C) conditions.**

| Gene ID          | 25Se               | 25Pt                 | 25St                | 25Pi               | 25Le               | 35Se                 | 35Pt                 | 35St                 | 35Pi                 | 35Le                 |
|------------------|--------------------|----------------------|---------------------|--------------------|--------------------|----------------------|----------------------|----------------------|----------------------|----------------------|
| <i>RcHDA6-1</i>  | 4.8506±0.3496 d    | 4.0044±0.4806 de     | 2.5522±1.0698 e     | 14.1843±5.4867 b   | 18.1732±2.5814 a   | 1.8529±0.1237 ef     | 2.1873±0.0757 e      | 13.4190±1.8155 c     | 1.2006±0.3398 ef     | 0.5211±0.1317 f      |
| <i>RcHDA6-2</i>  | 0.6086±0.1559 d    | 0.8326±0.1681 c      | 1.2235±0.1733 b     | 0.8752±0.2481 c    | 0.3556±0.0370 e    | 2.0772±0.3620 a      | 0.8983±0.2292 c      | 0.4692±0.0602 e      | 0.4051±0.0829 e      | 1.2411±0.2629 b      |
| <i>RcHDA19</i>   | 8.8756±1.7906 b    | 3.4863±0.2931 e      | 2.8117±0.6788 e     | 2.1002±0.4115 f    | 12.4680±1.3201 a   | 5.3915±0.3534 c      | 4.0827±0.9299 d      | 3.0453±0.2521 e      | 1.1409±0.0779 g      | 4.5421±1.1014 cd     |
| <i>RcHDA5</i>    | 0.5122±0.1167 f    | 0.9359±0.1783 d      | 0.7973±0.0371 e     | 1.7458±0.2067 b    | 0.3883±0.1425 f    | 1.9893±0.1648 a      | 0.4993±0.0307 f      | 1.2431±0.3989 c      | 0.9272±0.2636 d      | 0.7287±0.1170 e      |
| <i>RcHDA15</i>   | 8.2781±1.8727 a    | 2.4296±0.3994 c      | 0.2769±0.0499 e     | 0.3497±0.0737 e    | 9.0287±0.1675 a    | 4.3087±1.3349 b      | 0.4998±0.0712 de     | 0.9688±0.2704 d      | 0.2576±0.0601 e      | 1.0343±0.2594 d      |
| <i>RcHDA2-1</i>  | 20.0741±4.3331 b   | 0.9844±0.1826 de     | 0.6382±0.0851 de    | 3.2011±0.2953 d    | 28.0703±9.6093 a   | 15.3868±2.5633 c     | 1.3153±0.1641 de     | 1.9210±0.3392 de     | 0.5115±0.0853 e      | 2.7652±0.5453 de     |
| <i>RcHDA2-2</i>  | 7.1299±1.9705 a    | 0.2199±0.0219 e      | 0.2897±0.1016 e     | 1.0555±0.2472 d    | 5.2490±0.7321 b    | 4.2725±0.4489 c      | 0.3270±0.0202 e      | 0.7861±0.1833 de     | 0.0570±0.0110 e      | 0.8395±0.1067 de     |
| <i>RcHDA2-5</i>  | 2.1915±0.1662 d    | 0.5711±0.0445 ef     | 2.2329±0.6074 d     | 5.9364±2.0183 b    | 8.5245±1.7927 a    | 1.0480±0.0369 e      | 0.9097±0.0732 e      | 3.1186±0.2843 c      | 0.5502±0.0079 ef     | 0.2158±0.0330 f      |
| <i>RcHDA8</i>    | 2.1739±0.2603 de   | 1.7529±0.1744 e      | 4.1586±0.4008 c     | 9.0505±2.5483 a    | 4.8722±1.3556 b    | 1.0716±0.0998 ef     | 2.1070±0.1591 de     | 4.3894±2.0469 bc     | 2.7560±0.2036 d      | 0.6352±0.1090 f      |
| <i>RcHDA14-2</i> | 30.3796±3.9640 a   | 1.8330±0.0958 e      | 0.4198±0.0925 e     | 4.6780±1.3161 d    | 18.1518±1.7680 c   | 19.8382±3.8849 b     | 1.7624±0.2504 e      | 3.7971±2.2511 d      | 0.4414±0.0149 e      | 3.9057±0.1973 d      |
| <i>RcHDA14-3</i> | 2.2413±0.0396 a    | 0.0579±0.0006 f      | 0.0570±0.0184 f     | 0.4044±0.1950 d    | 1.2027±0.2751 c    | 1.3299±0.2324 b      | 0.1038±0.0370 f      | 0.2148±0.1357 e      | 0.0196±0.0027 f      | 0.2442±0.1508 e      |
| <i>RcSTR2</i>    | 2.3103±0.2727 b    | 0.8531±0.0663 d      | 0.1770±0.0383 ef    | 0.1115±0.0227 f    | 11.0094±0.7852 a   | 1.4734±0.1468 c      | 0.6476±0.1798 d      | 0.3609±0.0382 e      | 0.0853±0.0176 f      | 0.8643±0.1583 d      |
| <i>RcHDT1</i>    | 19.0941±1.7986 b   | 6.1130±1.5702 e      | 6.9274±1.6633 e     | 5.2706±0.4472 ef   | 32.8228±8.2153 a   | 12.9824±2.6456 c     | 6.9875±1.1008 e      | 10.2001±2.4904 d     | 3.6447±0.8866 f      | 14.5149±0.8345 c     |
| <i>RcHDT2</i>    | 3.1477±0.4337 f    | 14.5394±2.1136 b     | 26.2947±4.0051 a    | 12.3364±0.9434 c   | 10.4573±2.1982 d   | 1.0000±0.1139 g      | 8.3614±1.2254 e      | 10.1392±1.5520 d     | 12.2903±0.8917 c     | 0.5743±0.1000 g      |
| <i>RcHAG1</i>    | 280.4564±73.7220 c | 374.4544±80.5126 b   | 120.5811±22.7445 e  | 58.3551±10.3943 f  | 1.0000±0.2309 g    | 183.5061±52.0257 d   | 164.4738±13.9708 de  | 429.7945±124.1338 a  | 103.1349±23.5513 e   | 396.8948±18.2811 b   |
| <i>RcHAG2</i>    | 212.4227±30.9777 f | 567.5547±169.4520 c  | 105.7994±28.8740 g  | 28.5742±3.9418 h   | 1.7770±0.4721 h    | 903.9821±89.8152 b   | 275.5408±37.6193 e   | 195.0845±64.7209 f   | 339.3324±19.4268 d   | 1211.4075±49.1641 a  |
| <i>RcHAG4</i>    | 826.2873±27.4253 g | 2645.1158±178.6772 d | 677.9957±133.0009 g | 318.4642±38.4116 h | 248.1073±26.6545 h | 4504.2930±332.9750 a | 1527.1612±269.3548 e | 1270.5757±502.8011 f | 3666.4884±143.3607 b | 3317.7079±235.6567 c |
| <i>RcHAC4</i>    | 191.5793±10.9531 a | 21.0705±3.8870 f     | 7.0724±1.4421 g     | 19.0281±2.4499 fg  | 12.1759±1.5031 g   | 162.7796±16.7516 b   | 135.2246±7.0768 c    | 107.7987±25.1440 d   | 15.2267±2.6003 fg    | 96.6832±2.8881 e     |
| <i>RcHAF2</i>    | 774.3281±79.4892 a | 308.7874±3.3538 c    | 101.4640±23.4234 f  | 71.2960±10.7882 g  | 15.2515±1.8190 h   | 259.1747±40.4402 d   | 260.5073±19.1848 d   | 241.8952±22.5972 de  | 417.2425±11.6523 b   | 238.5693±5.1324 e    |

Means with different letters (a, b, c,...) indicate statistically significantly different at P<0.05, Single Factor ANOVA along with Least Significant Difference test).
